# Supplementary material for: Nutrient Accumulation Pattern in Mixtures of Wheat and Faba Bean Is Strongly Influenced by Cultivar Choice and Co-Existing Weeds
Source: MDPI journal article supplement (doi:10.3390/biology11050630), 2022-04-20
Supplement: s1 [file s1]

Article

# Nutrient Accumulation Pattern in Mixtures of Wheat and Faba Bean Is Strongly Influenced by Cultivar Choice and Co-Existing Weeds

James Ajal \* and Martin Weih

Department of Crop Production Ecology, Swedish University of Agricultural Sciences, P.O. Box 7043, SE-75007 Uppsala, Sweden; martin.weih@slu.se

\* Correspondence: james.ajal@slu.se; Tel.: +46702157239

## Supplementary Information

**Table S1.** Analysis of variance for Nitrogen Accumulation Efficiency (NAE) components and shoot dry weight at flowering for different cultivars of cereals and legumes. The different cultivars (Cultivars) were grown as sole crops and in mixtures (Mix.Sole), with and without *C. album* (Weed). Symbols show ANOVA results with significance levels; \*\*\* =  $P \leq 0.001$ ; \*\* =  $P \leq 0.01$ ; \* =  $P \leq 0.05$ .

|                                                           | Cereals |          | Legumes |         |
|-----------------------------------------------------------|---------|----------|---------|---------|
|                                                           | F-value | p-value  | F-value | p-value |
| <b>N uptake efficiency (<math>U_N</math>)</b>             |         |          |         |         |
| Weed                                                      | 6.26    | 0.0666   | 3.95    | 0.1179  |
| Cultivar                                                  | 3.92    | 0.1187   | 6.79    | 0.0597  |
| Mix.Sole                                                  | 33.35   | 0.0045** | 18.27   | 0.0129* |
| Weed × Cultivar                                           | 0.17    | 0.7053   | 1.01    | 0.3723  |
| Weed × Mix.Sole                                           | 0.31    | 0.6080   | 2.19    | 0.2134  |
| Cultivar × Mix.Sole                                       | 0.01    | 0.9451   | 0.05    | 0.8399  |
| Weed × Cultivar × Mix.Sole                                | 0.12    | 0.7457   | 1.28    | 0.3211  |
| <b>Grain specific N efficiency (<math>E_{N,g}</math>)</b> |         |          |         |         |
| Weed                                                      | 2.12    | 0.2192   | 1.29    | 0.3195  |
| Cultivar                                                  | 0.44    | 0.5427   | 3.59    | 0.1312  |
| Mix.Sole                                                  | 4.11    | 0.1126   | 1.90    | 0.2397  |
| Weed × Cultivar                                           | 0.59    | 0.4852   | 0.27    | 0.6280  |
| Weed × Mix.Sole                                           | 0.86    | 0.4055   | 0.15    | 0.7175  |
| Cultivar × Mix.Sole                                       | 3.88    | 0.1203   | 0.15    | 0.7210  |
| Weed × Cultivar × Mix.Sole                                | 0.08    | 0.7866   | 0.80    | 0.4205  |
| <b>Grain N concentration (<math>C_{N,g}</math>)</b>       |         |          |         |         |
| Weed                                                      | 0.60    | 0.4818   | 0.86    | 0.4071  |
| Cultivar                                                  | 0.60    | 0.4818   | 2.72    | 0.1743  |
| Mix.Sole                                                  | 1.93    | 0.2376   | 1.23    | 0.3293  |
| Weed × Cultivar                                           | 1.41    | 0.3007   | 0.36    | 0.5787  |
| Weed × Mix.Sole                                           | 3.07    | 0.1545   | 3.42    | 0.1381  |
| Cultivar × Mix.Sole                                       | 4.80    | 0.0936   | 0.00    | 0.9787  |
| Weed × Cultivar × Mix.Sole                                | 0.64    | 0.4668   | 0.01    | 0.9361  |
| <b>Shoot dry weight</b>                                   |         |          |         |         |
| Weed                                                      | 1.17    | 0.3406   | 0.57    | 0.4906  |
| Cultivar                                                  | 3.61    | 0.1302   | 14.01   | 0.0201* |
| Mix.Sole                                                  | 19.20   | 0.0119*  | 13.75   | 0.0207* |

|                            |      |        |      |        |
|----------------------------|------|--------|------|--------|
| Weed × Cultivar            | 1.01 | 0.3726 | 0.87 | 0.4030 |
| Weed × Mix.Sole            | 0.43 | 0.5491 | 0.49 | 0.5224 |
| Cultivar × Mix.Sole        | 1.19 | 0.3363 | 0.12 | 0.7460 |
| Weed × Cultivar × Mix.Sole | 0.07 | 0.8083 | 0.38 | 0.5708 |

**Table S2.** Analysis of variance for yield assessed as head weight and pod weight in the cereals and legumes, respectively. Analysis was done for different cultivar combinations pot-grown in sole crops and mixtures (Mix.Sole), with and without the weed *C. album* (Weed). Symbols show results with significance levels, \*\*\* =  $P \leq 0.001$ ; \*\* =  $P \leq 0.01$ ; \* =  $P \leq 0.05$ .

| Cultivar combinations | Cereals |           | Legumes |         |
|-----------------------|---------|-----------|---------|---------|
|                       | F-value | p-value   | F-value | p-value |
| <b>Alderon-Fuego</b>  |         |           |         |         |
| Mix.Sole              | 58.11   | 0.0003*** | 5.23    | 0.0622  |
| Weed                  | 3.66    | 0.1516    | 1.31    | 0.3354  |
| Mix.Sole × Weed       | 0.00    | 0.9472    | 0.85    | 0.3916  |
| <b>Alderon-Boxer</b>  |         |           |         |         |
| Mix.Sole              | 26.61   | 0.0021**  | 7.23    | 0.0361* |
| Weed                  | 7.88    | 0.0674    | 17.26   | 0.0254* |
| Mix.Sole × Weed       | 0.54    | 0.4911    | 4.58    | 0.0762  |
| <b>Diskett-Fuego</b>  |         |           |         |         |
| Mix.Sole              | 24.96   | 0.0025**  | 2.99    | 0.1343  |
| Weed                  | 7.01    | 0.0772    | 0.58    | 0.5004  |
| Mix.Sole × Weed       | 2.17    | 0.1908    | 0.90    | 0.3792  |
| <b>Diskett-Boxer</b>  |         |           |         |         |
| Mix.Sole              | 6.16    | 0.0476*   | 8.04    | 0.0297* |
| Weed                  | 2.78    | 0.1942    | 0.45    | 0.5497  |
| Mix.Sole × Weed       | 1.01    | 0.3539    | 0.52    | 0.4974  |

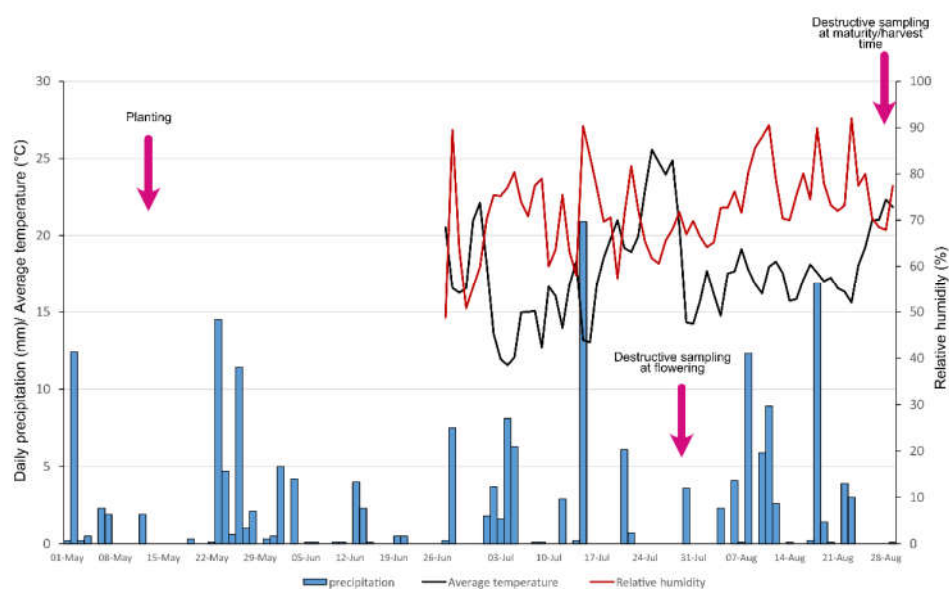

**Figure S1.** Daily precipitation, average temperature and relative humidity for Ultuna near Uppsala, Central Sweden, during the period of experimentation in 2019. The arrows show the time points for planting, and destructive samplings at flowering and maturity. Relative humidity and air temperature data were recorded using a weather logger installed in net yard. Rainfall data was accessed from Ultuna Climate Station, Uppsala (Sweden).
